# Supplementary material
Source: MDPI journal article supplement (https://www.mdpi.com/2071-1050/16/7/3035)
Supplement: s1 [file s1]

## Supplementary Data

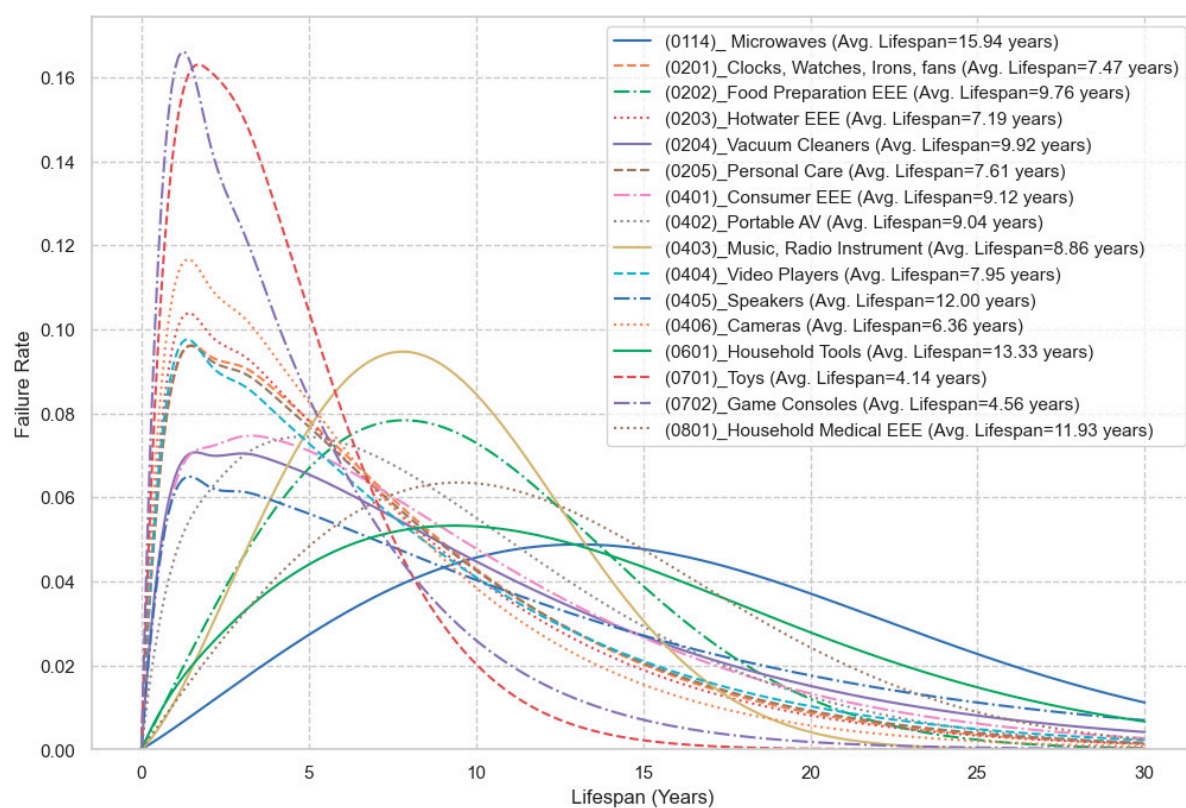

Figure S1: Failure Rates of small EEE

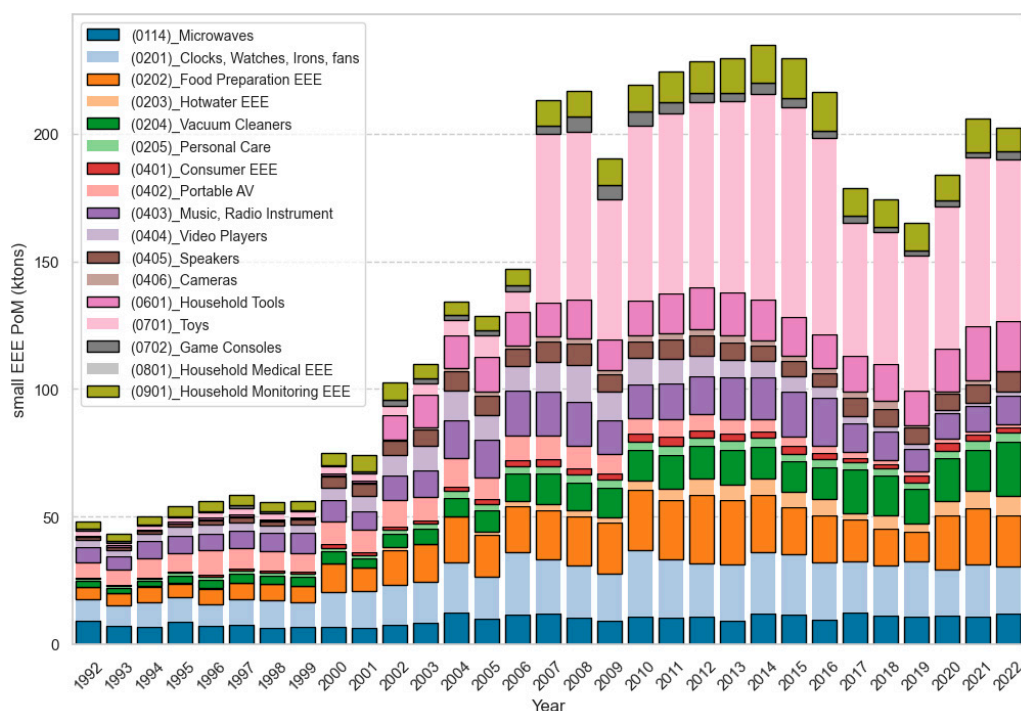

Figure S2: Imports and exports for small EEE

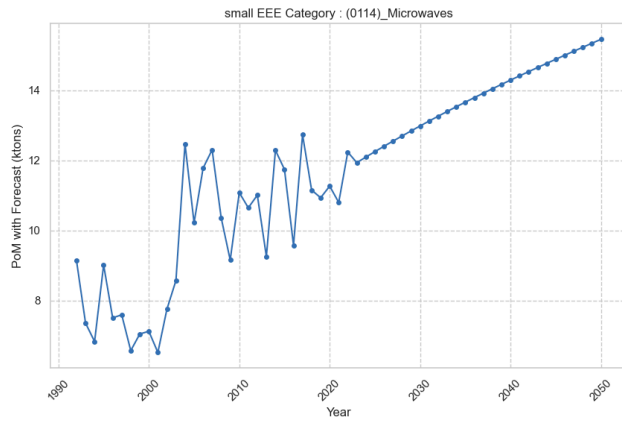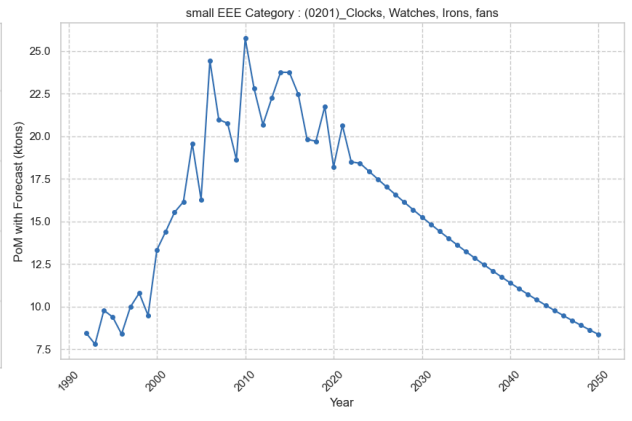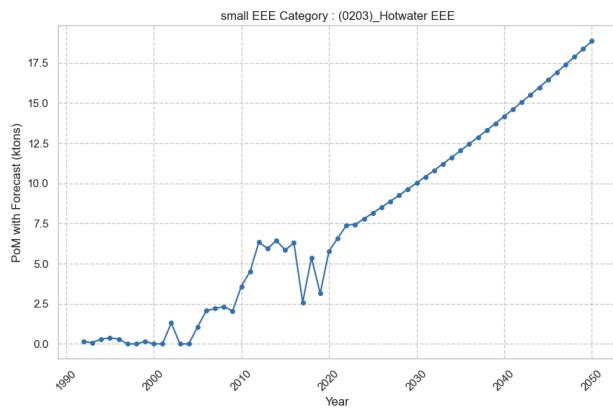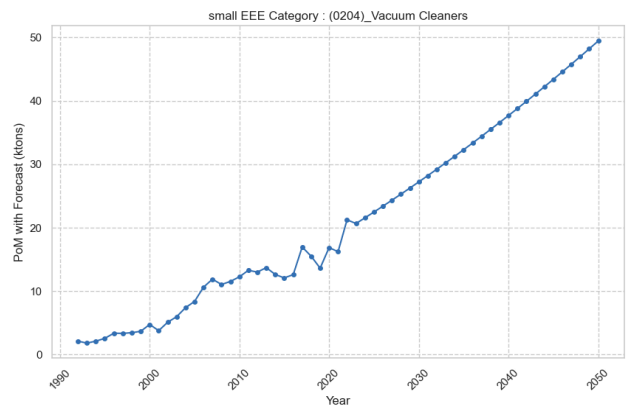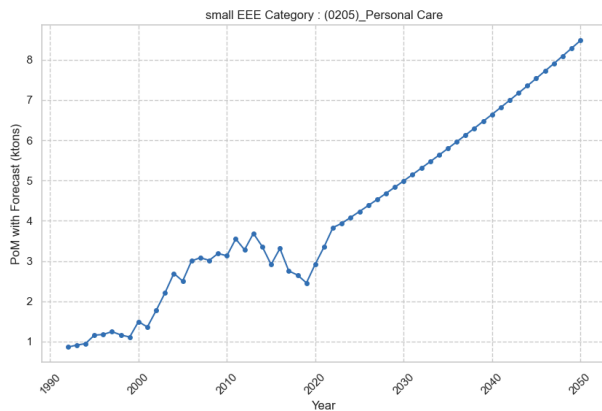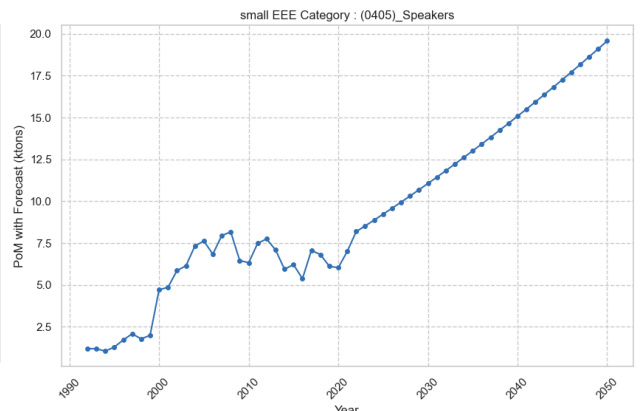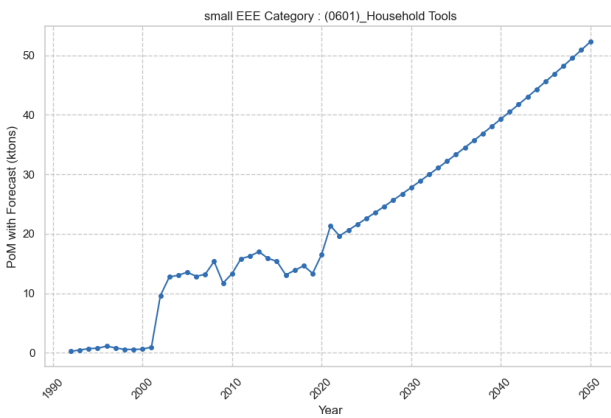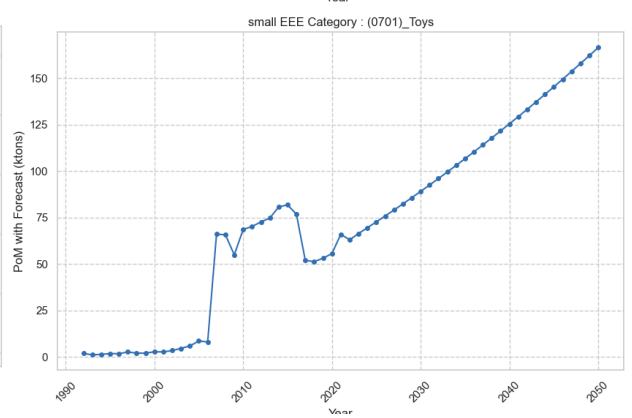

Figure S3: Sample PoM small EEE Forecasts

## PoM small EEE Forecast

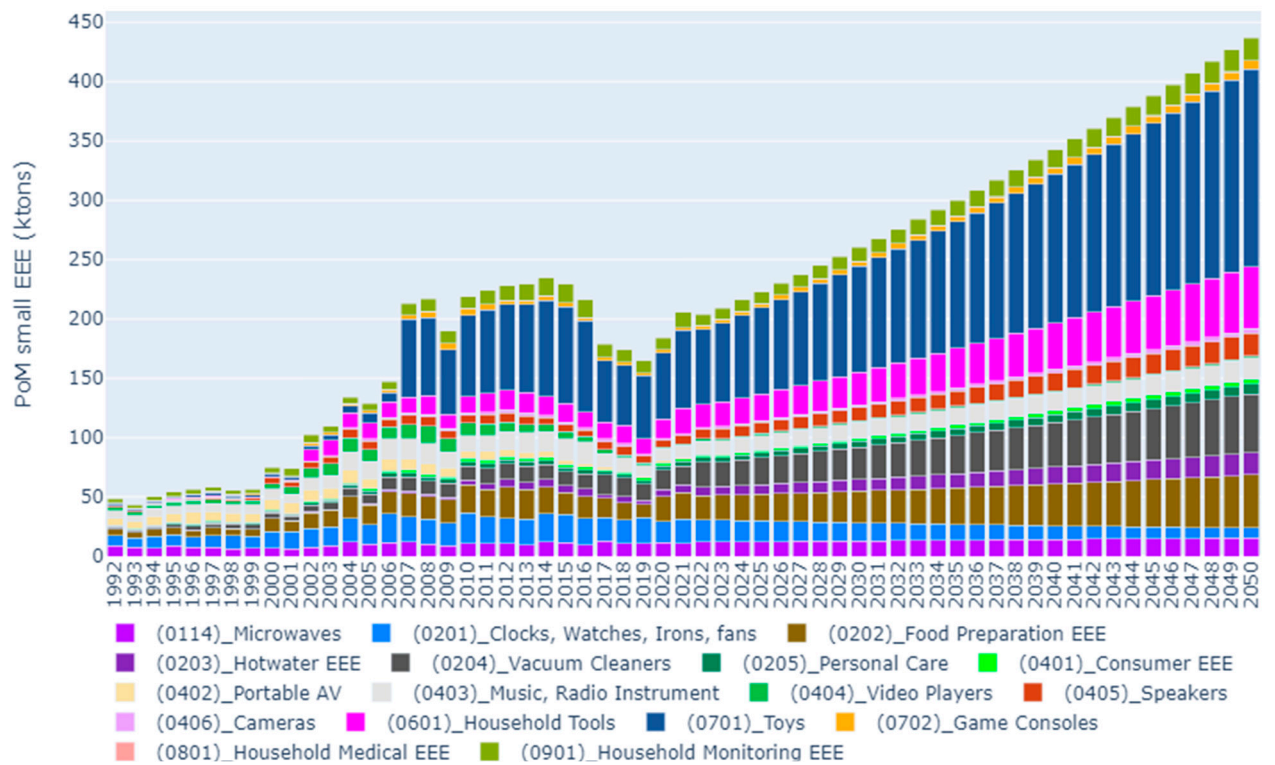

Figure S4: PoM small EEE (ktons)

## Material Quantities

Table S1: Material Quantity and Prices

| Key                                 | Fe%   | Cu%    | Al%    | Plastic% | Ag%   | Au%    | Other%  |
|-------------------------------------|-------|--------|--------|----------|-------|--------|---------|
| (0114)_Microwaves                   | 74.4  | 2.3    | 2.6    | 5.9      | 0.005 | 0.0025 | 14.7925 |
| (0201)_Clocks, Watches, Irons, fans | 53.65 | 4.75   | 6.7    | 30.6     | 0.005 | 0.0025 | 4.2925  |
| (0202)_Food Preparation EEE         | 39.84 | 7.98   | 10.16  | 39.68    | 0.005 | 0.0025 | 2.3325  |
| (0203)_Hotwater EEE                 | 27.65 | 5      | 5.35   | 60       | 0.005 | 0.0025 | 1.9925  |
| (0204)_Vacuum Cleaners              | 21.5  | 6      | 0.95   | 60.9     | 0.005 | 0.0025 | 10.6425 |
| (0205)_Personal Care                | 25.8  | 13.05  | 0.3    | 55.2     | 0.005 | 0.0025 | 5.6425  |
| (0401)_Consumer EEE                 | 42.5  | 4      | 0      | 38.4     | 0.005 | 0.0025 | 15.0925 |
| (0402)_Portable AV                  | 60.15 | 1.7    | 4.75   | 17.4     | 0.005 | 0.0025 | 15.9925 |
| (0403)_Music, Radio Instrument      | 22.4  | 0.4    | 0      | 75.5     | 0.005 | 0.0025 | 1.6925  |
| (0404)_Video Players                | 60.15 | 1.7    | 4.75   | 17.4     | 0.005 | 0.0025 | 15.9925 |
| (0405)_Speakers                     | 30.4  | 6.2    | 1.8    | 59       | 0.005 | 0.0025 | 2.5925  |
| (0406)_Cameras                      | 43    | 1      | 3      | 28       | 0.005 | 0.0025 | 24.9925 |
| (0601)_Household Tools              | 33.3  | 8.0667 | 0.4333 | 43.1667  | 0.005 | 0.0025 | 15.0258 |
| (0701)_Toys                         | 9.99  | 2.13   | 1.86   | 69.82    | 0.005 | 0.0025 | 16.1925 |
| (0702)_Game Consoles                | 29.1  | 6.9    | 7      | 52.2     | 0.005 | 0.0025 | 4.7925  |

|                                    |      |      |      |      |       |        |        |
|------------------------------------|------|------|------|------|-------|--------|--------|
| (0801)_Household<br>Medical EEE    | 29.1 | 6.9  | 7    | 52.2 | 0.005 | 0.0025 | 4.7925 |
| (0901)_Household<br>Monitoring EEE | 29.1 | 6.9  | 7    | 52.2 | 0.005 | 0.0025 | 4.7925 |
| Market_Price_2021<br>AUD/kg        | 0.19 | 10.3 | 2.62 | 1.95 | 1064  | 79335  | 0      |

(Adapted from (Islam & Huda, 2020; LifeCycles, 2021; Parajuly et al., 2017; Sam Haig, 2012))

## Results from the WGR Model

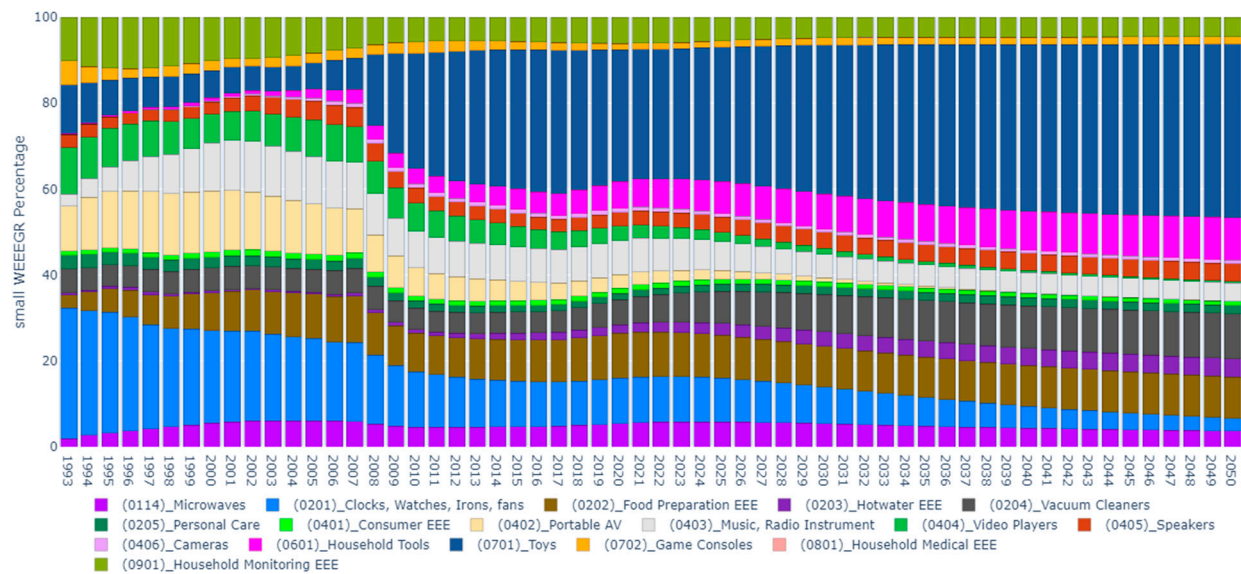

Figure S5: Percentage small WEEE (1992 – 2050)

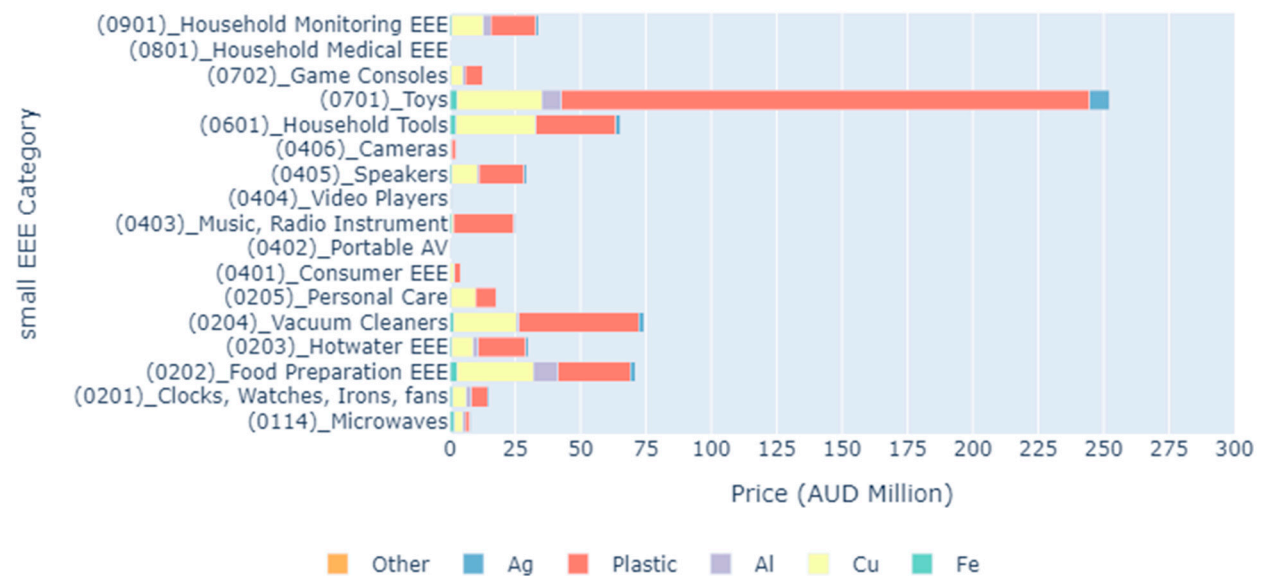

Figure S6: Forecasted revenue from recycling of small WEEE in 2050 – SCN1

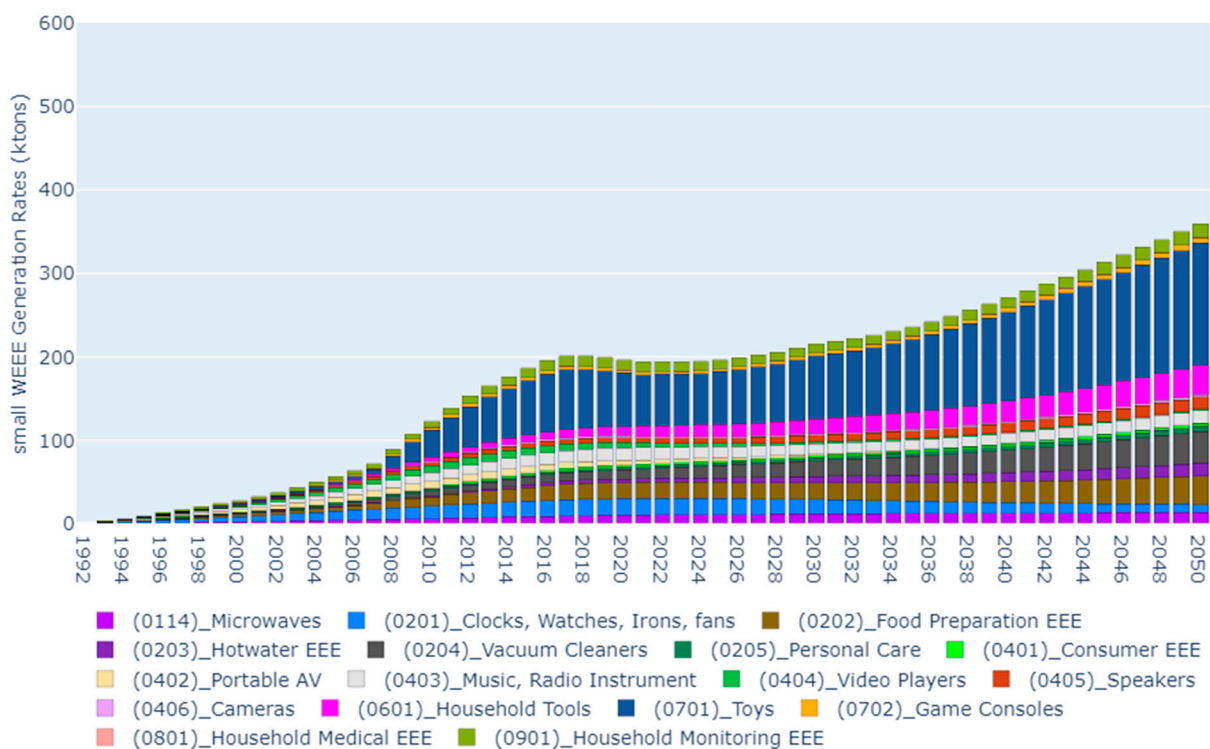

Figure S7: small WEEE Generation Rates in 2050 – SCN2

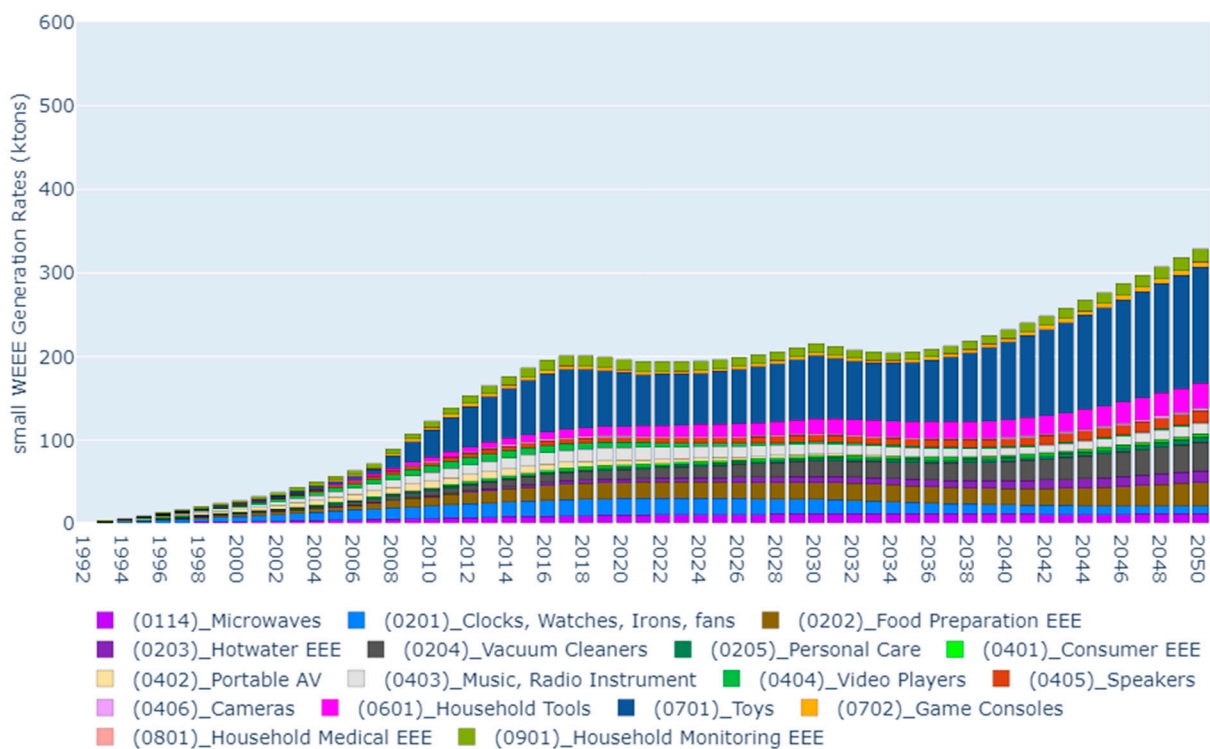

Figure S8: small WEEE Generation Rates in 2050 – SCN5



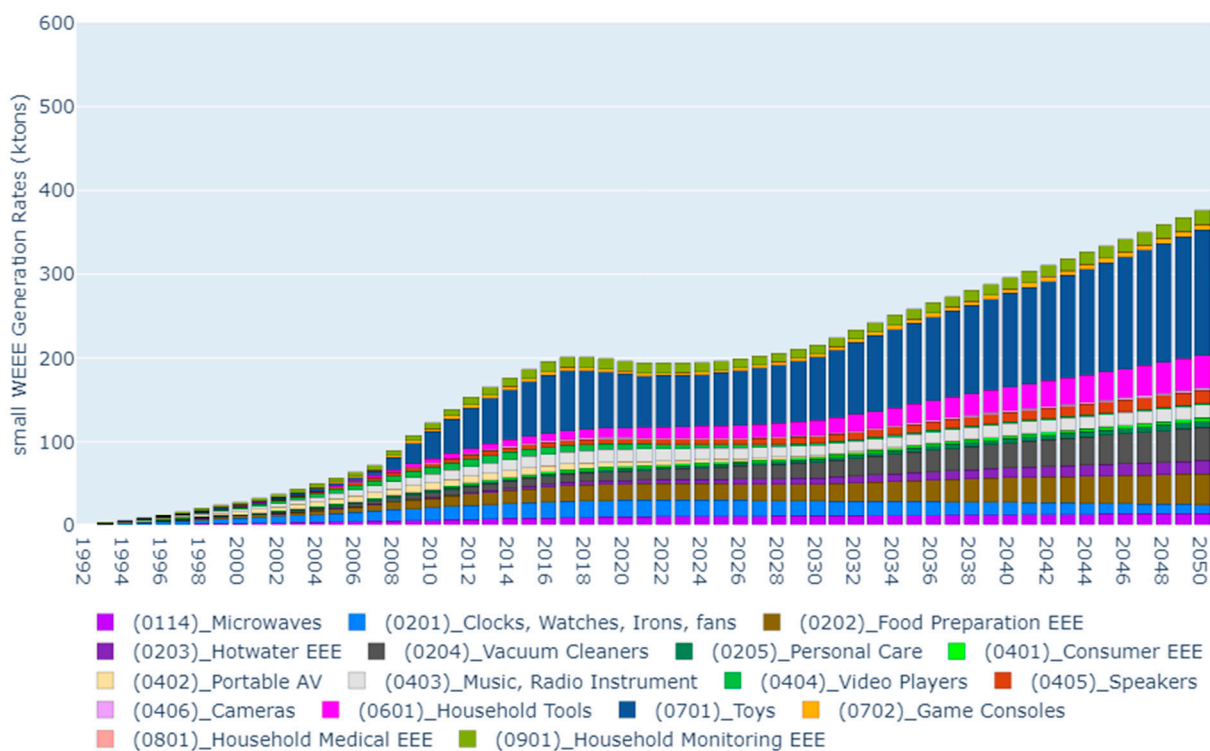

Figure S9: small WEEE Generation Rates in 2050 – SCN10

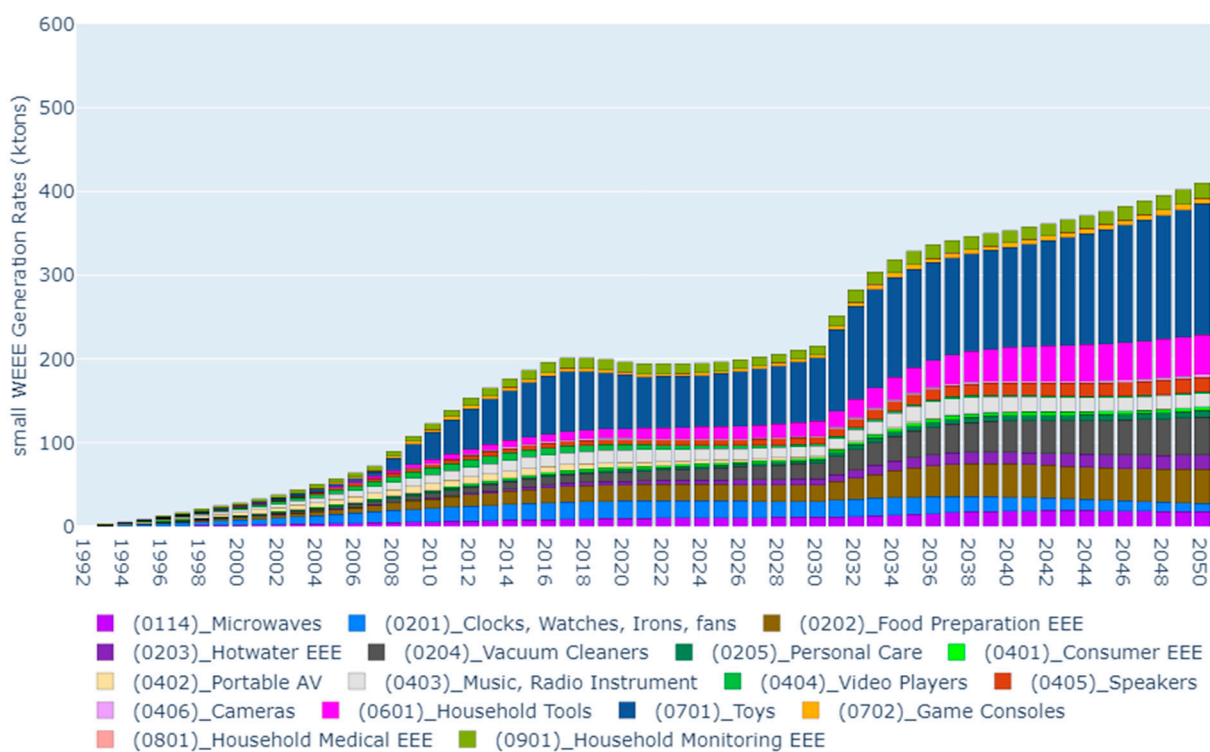

Figure S10: small WEEE Generation Rates in 2050 – SCN13

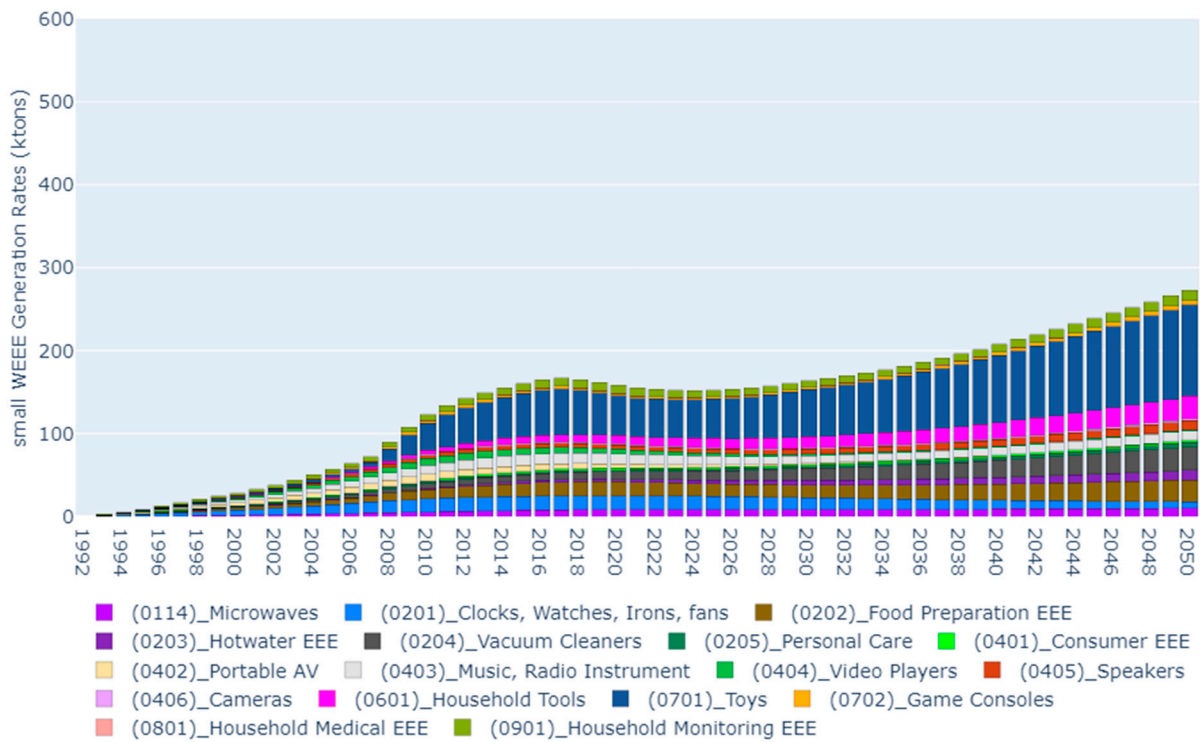

Figure S11: small WEEE Generation Rates in 2050 – SCN18

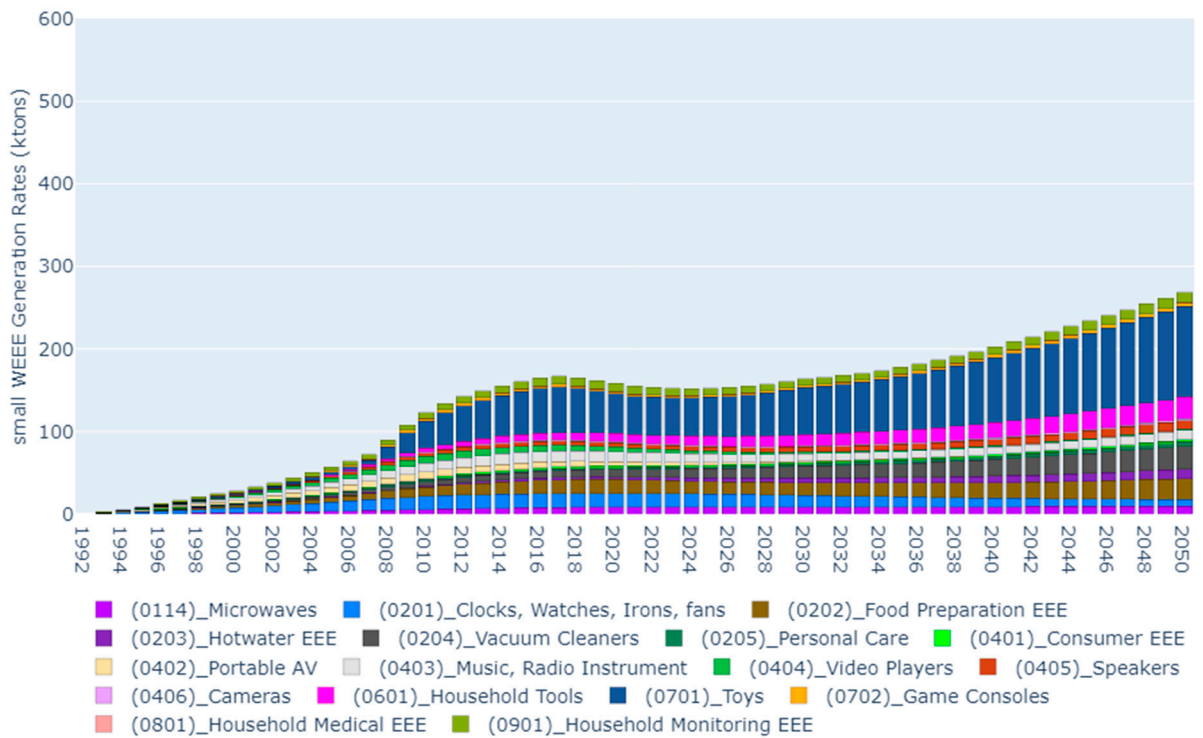

Figure S12: small WEEE Generation Rates in 2050 – SCN26



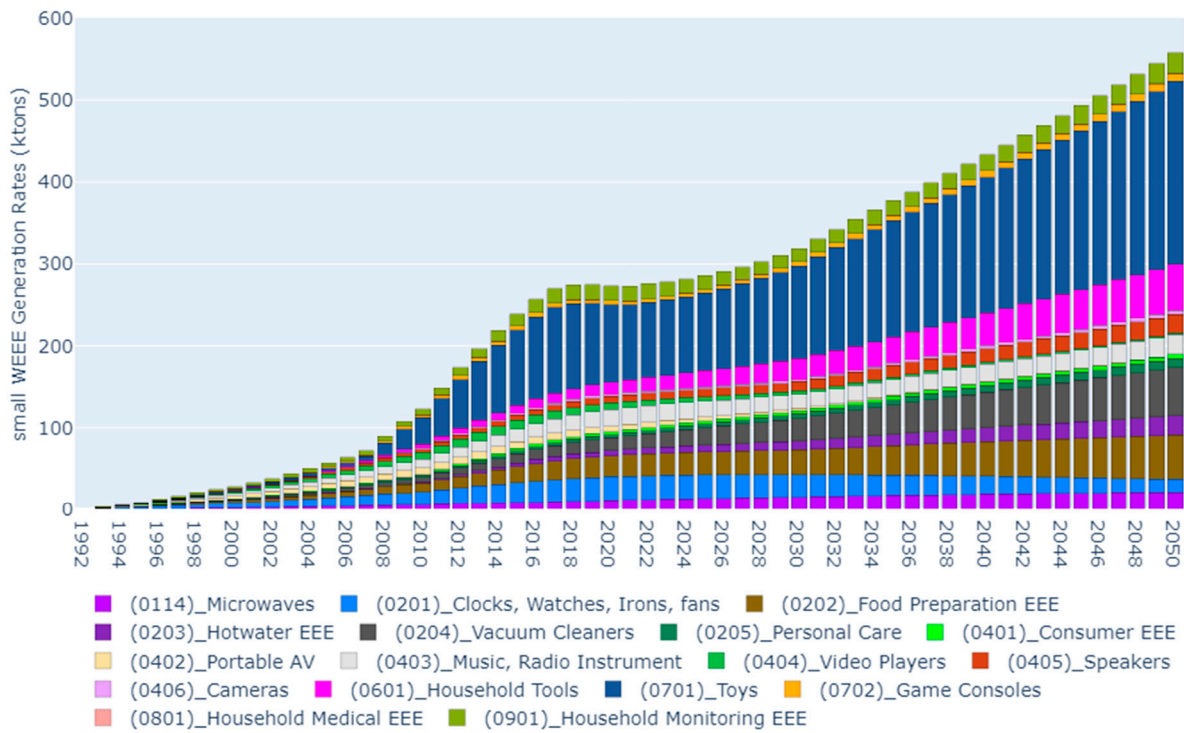

Figure S13: small WEEE Generation Rates in 2050 – SCN34

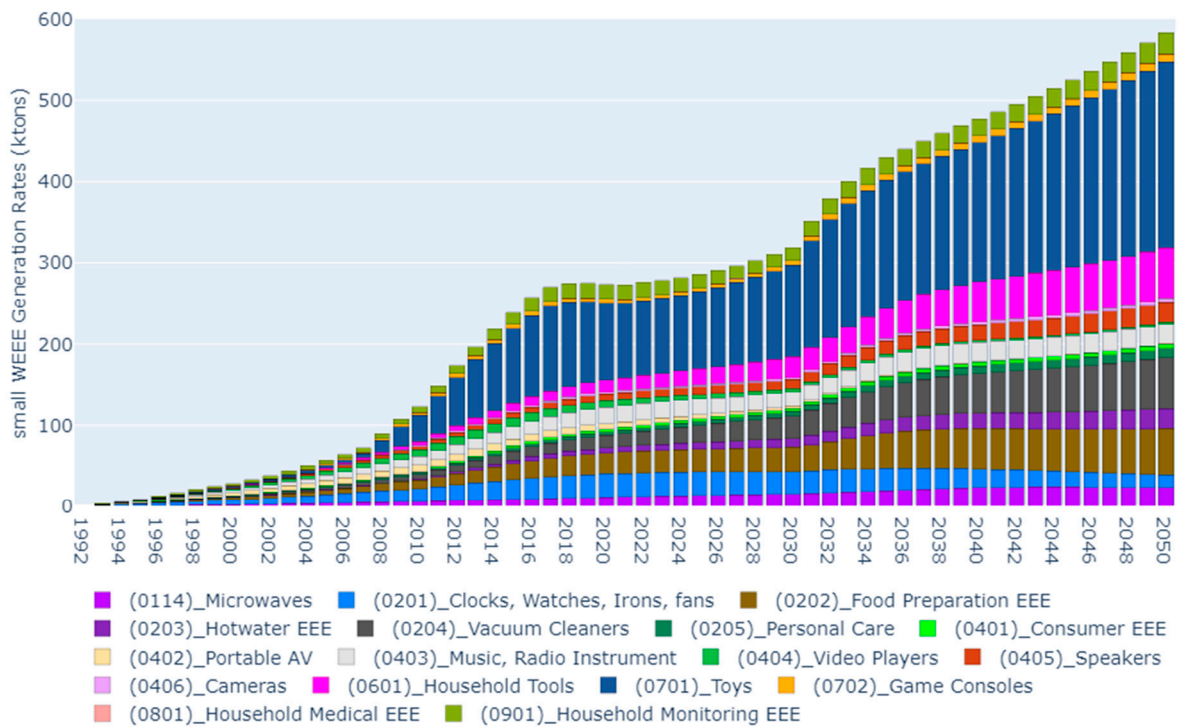

Figure S14: small WEEE Generation Rates in 2050 – SCN49

## References

- Islam, M. T., & Huda, N. (2020). Assessing the recycling potential of “unregulated” e-waste in Australia. *Resources, Conservation and Recycling*, 152, 104526. <https://doi.org/10.1016/j.resconrec.2019.104526>
- LifeCycles, I. (2021). *E-PRODUCT STEWARDSHIP IN AUSTRALIA*.
- Parajuly, K., Habib, K., & Liu, G. (2017). Waste electrical and electronic equipment (WEEE) in Denmark: Flows, quantities and management. *Resources, Conservation and Recycling*, 123, 85-92. <https://doi.org/10.1016/j.resconrec.2016.08.004>
- Sam Haig, L. M., Roger Morton and Simon Wilkinson. (2012). *Electrical product material composition*.
